# Supplementary material
Source: publisher figshare collection journal article supplement (https://rs.figshare.com/ndownloader/files/34409001)
Supplement: Supplementary file 1 [file 34409001]

## Sheet: Supplementary material Table S2
Electronic supplementary material Table S2. Genetic clade, sex determination (by aDNA and/or tusk socket measurement) and stable isotope data for walrus rostra and control specimens considered in this study
From: Barrett, J.H., Khamaiko, N., Ferrari, G., Cuevas, A., Kneale, C., Hufthammer, A.K., Pálsdóttir, A.H. & Star, B. 2022 Walruses on the Dnieper: New evidence for the intercontinental trade of Greenlandic ivory in the Middle Ages. Proceedings of the Royal Society B. doi:10.1098/rspb.2021.2773
Sample number	aDNA sample numbera	Museum/archive number	Rostrum type	Genetic clade (w=western; e=eastern)	Location	Aligned reads (n)	X chromosome coverage	Autosomal coverage	Ratio	Genetic sex determination	Maximum tusk socket cross section, left, right or mean (mm)	Minimum tusk socket cross section, left, right or mean (mm)	Osteometric sex determination	Combined sex determination	Stable isotope sample type	Collagen % yield	Mean δ13CVPDB (3 runs) (‰)†	Mean δ15NAIR (3 runs) (‰)†	δ34SVCDT (‰)‡	δ34SVCDT replication run (‰)‡	Mean δ34SVCDT (‰)‡	δ2HVSMOW (measured) (‰)‡‡	δ2HVSMOW (measured) replication run (‰)‡‡	Mean δ2HVSMOW (measured) (‰)‡‡	δ2HVSMOW (non-exchangeable) (‰)‡‡	δ2HVSMOW (non-exchangeable) replication run (‰)‡‡	Mean δ2HVSMOW (non-exchangeable) (‰)‡‡	%C	%N	%S	%H	C/N	C/S	N/S	C/H	N/H	Excluded from analysis due to sulphur C/S or N/S thresholds
New data
R64	WLR074	2319; sample S_07-2-2319	2	w	Kyiv	742357	0.009	0.017	0.529412	male	63		male	male	rostrum bone chunk	13.3723	-12.9547	11.7573	14.0451	13.9096	13.9774	-7.82375	-4.61109	-6.21742	37.1357	40.8299	38.9828	44.9569	16.9128	0.236736	5.55728	3.10121	506.407	163.295	0.674143	0.217383	no
R65	WLR075	2369; sample S_07-1-2369	2/3	w	Kyiv	236919	0.0032	0.0061	0.52459	male	61	41	male	male	rostrum bone chunk	14.0956	-12.682	10.975	13.56	13.5343	13.5471	-10.7819	-11.0539	-10.9179	33.7342	33.4214	33.5778	42.4503	15.8715	0.235979	5.70508	3.12048	479.707	153.732	0.620067	0.198713	no
R66	WLR076	2825; sample S_07-1-2825	2/3	w	Kyiv	431319	0.0061	0.012	0.508333	male	>63		male	male	rostrum bone chunk	10.9571	-12.9707	10.4417	13.7559	13.8765	13.8162	-14.6884	-14.3321	-14.5103	29.2422	29.6519	29.4471	42.2094	15.8586	0.222802	5.70211	3.10541	505.195	162.693	0.616868	0.198656	no
R71	WLR077	2937; sample S_11-2-2937	uncertain (1?)	e	Kyiv	3505588	0.0477	0.09	0.53	male	>63		male	male	rostrum bone chunk	15.9603	-12.9473	11.2133	14.0203	13.7828	13.9015	-10.4582	-13.6838	-12.071	34.1065	30.3973	32.2519	42.7674	16.1783	0.225077	5.64013	3.08454	506.699	164.295	0.631892	0.204888	no
R72	WLR078	2938; sample S_11-2-2938	2/3	e	Kyiv	105333	0.021	0.022	0.954545	female	37	25	female	female	rostrum bone chunk	17.5353	-12.9007	10.6157	14.5957	14.5064	14.5511	-21.8749	-25.2819	-23.5784	21.4211	17.434	19.4275	42.7589	16.1179	0.222278	5.63048	3.09476	512.978	165.742	0.632849	0.204472	no
R73	WLR079	2939; sample S_11-2-2939	2/3	w	Kyiv	1123953	0.0262	0.029	0.903448	female	44	32	female	female	rostrum bone chunk	16.3975	-13.0853	10.5623	14.612	14.5714	14.5917	-26.3309	-24.6673	-25.4991	16.2063	18.1532	17.1798	43.6529	16.437	0.227994	5.67835	3.09886	510.573	164.786	0.640633	0.206763	no
R74	WLR080	1833; sample S_11-3-1833	uncertain	w	Kyiv	972266	0.013	0.024	0.541667	male	NA		uncertain	male	rostrum bone chunk	15.1486	-13.6413	10.56	13.72	13.5229	13.6215	-39.7535	-38.4712	-39.1123	0.498086	1.99873	1.24841	42.8907	16.0709	0.233492	5.57763	3.11317	489.846	157.322	0.640814	0.205808	no
R75	NA	2940; sample S_11-2-2940	uncertain		Kyiv						NA		uncertain
R76	NA	7174; sample S_08-2-7174	2/3		Kyiv						NA		uncertain
B1876	WLR028	JS1855	control (tusk socket for isotopes)	na	Moffen, Svalbard	na					38	25	female	female	rostrum bone chunk	18.1809	-13.5043	9.48667	14.8722	14.2859	14.5791	-16.491	-19.7629	-18.127	27.1694	23.4071	25.2882	45.9645	16.897	0.241113	5.81373	3.174	508.36	160.181	0.65885	0.207599	no
B1877	WLR021	JS1855	control (tusk socket for isotopes; petrous for aDNA)	e	Moffen, Svalbard	10437493	0.23	0.42	0.547619	male	NA		uncertain	male	rostrum bone chunk	16.9752	-12.6543	10.532	15.872	15.8621	15.867	3.71051	6.41181	5.06116	50.3988	53.505	51.9519	43.8133	16.1229	0.228974	5.6679	3.17024	510.257	160.946	0.644173	0.203186	no
B1895	WLR026	JS1855	control (tusk socket for isotopes)	na	Moffen, Svalbard	na					39	25	female	female	rostrum bone chunk	16.3608	-14.0433	9.00333	15.3701	15.0546	15.2123	-13.5223	-10.6657	-12.094	30.5831	33.8679	32.2255	42.2952	15.6527	0.234591	5.68848	3.15284	480.784	152.511	0.619604	0.196547	no
B1907	WLR022	JS1855	control (tusk socket for isotopes; petrous for aDNA)	e	Moffen, Svalbard	9915925	0.208	0.37	0.562162	male	55	31	male	male	rostrum bone chunk	17.4289	-14.4497	9.062	15.1866	15.5988	15.3927	-20.3521	-19.1916	-19.7719	22.7296	24.0641	23.3968	42.7137	15.7376	0.227492	5.52254	3.16609	500.692	158.123	0.644536	0.203551	no
B1912	WLR025	JS1855	control (tusk socket for isotopes)	na	Moffen, Svalbard	na					59	38	male	male	rostrum bone chunk	18.4013	-13.898	9.25133	14.8609	15.062	14.9614	-23.0494	-20.5971	-21.8232	19.6281	22.4479	21.038	42.0381	15.7357	0.221434	5.61535	3.11654	506.254	162.429	0.623856	0.200161	no
WLR035	WLR035	2008-32-709 #1051	control (skull bone)	na	Alþingisreitur, Iceland	na					NA		uncertain	uncertain	skull fragment bone chunk	11.2643	-12.1743	11.42	12.1865	11.9369	12.0617	-26.809	-29.1713	-27.9901	15.6468	12.8822	14.2645	42.2705	15.8433	0.261397	5.74562	3.11214	431.226	138.538	0.613083	0.196962	no
WLR036	WLR036	2008-32-685 # 711	control (pelvis)	na	Alþingisreitur, Iceland	15189	0.0002	0.00023	0.869565	female	NA		uncertain	female	pelvis bone chunk	21.2893	-12.5713	11.0843	13.6013	13.5163	13.5588	-20.6674	-19.8456	-20.2565	22.8342	23.796	23.3151	43.4836	16.0264	0.304349	5.69111	3.16558	380.998	120.361	0.636719	0.201146	no
Previously published data (Barrett et al. 2020)
R1	WLR046	N167587	3/4	w	Trondheim	14174	0.000245719	0.000427791	0.57439	male	63		male	male	rostrum bone chunk	6.01418	-13.165	11.8617	13.4336	12.8845	13.159	-7.70989	-4.6143	-6.1621	39.1284	42.865	40.9967	42.7719	16.0638	0.220951	5.53889	3.10607	516.215	166.178	0.643508	0.207156	no
R2	WLR044	N29494	2	w	Trondheim	305766	0.00466166	0.00813993	0.57269	male	>47		uncertain	male	rostrum bone chunk	9.73621	-12.6753	11.735	16.0833		16.0833	11.9259		11.9259	62.8301		62.8301	41.7586	15.585	0.324696	5.61588	3.12632	342.955	109.711	0.619651	0.198226	no
R3	WLR041	N32091	1	w	Trondheim	45053	0.000626242	0.0010991	0.569777	male	54		male	male	rostrum bone chunk	3.36904	-13.1507	13.2644	18.7324		18.7324	22.1622		22.1622	75.1859		75.1859	40.0044	14.9344	0.35906	5.50474	3.12588	297.105	95.0698	0.605606	0.193786	yes
R4	WLR047	N37603	3	e	Trondheim	301445	0.00403593	0.00674987	0.597927	male	64	40	male	male	rostrum bone powder	7.0302	-12.8513	12.4794	13.1306		13.1306	18.6205		18.6205	70.9109		70.9109	37.9667	14.2639	0.346719	5.33239	3.10542	292.007	94.0336	0.593335	0.191069	yes
R5	WLR048	N203145	2/3	w	Trondheim	310752	0.00490026	0.00839263	0.583877	male	>60		male	male	rostrum bone chunk	7.92453	-12.8843	11.8938	13.8015		13.8015	23.2736	22.1903	22.732	76.5274	75.2198	75.8736	41.5452	15.6411	0.305495	5.71695	3.09903	362.648	117.027	0.605586	0.195423	no
R6	WLR038	N10102	uncertain	e	Trondheim	113454	0.0017617	0.00291379	0.604608	male	>70		male	male	rostrum bone chunk	4.0251	-13.253	11.5158	14.1972	13.6563	13.9268	2.78018		2.78018	51.7906		51.7906	42.3385	15.948	0.230747	5.56352	3.09805	489.291	157.976	0.634169	0.204752	no
R7		N10735	3		Trondheim						70		male	male
R8	WLR043	BRM0/2709/1	unique type	e	Bergen	7252	8.52109e-05	0.000168787	0.504843	male	55b	37	male	male	rostrum bone chunk	5.36246	-14.455	10.5608	13.3973		13.3973	-29.6007		-29.6007	12.7048		12.7048	38.3062	14.2229	0.250707	5.51751	3.14379	407.447	129.671	0.578556	0.184127	no
R9		BRM0/3028/1	4		Bergen						45	31	uncertain	uncertain
R10	WLR039	BRM0/46092/1	3/4	w	Bergen	8129	0.000158659	0.000182991	0.867032	female	39	26	female	female	rostrum bone chunk	7.37385	-13.2683	10.7508	12.2327		12.2327	-27.4899		-27.4899	15.2527		15.2527	41.5952	15.6789	0.21826	5.78105	3.09518	508.204	164.197	0.599591	0.193723	no
R11	WLR045	BRM0/87411/1	4	w	Bergen	78851	0.0020686	0.00210177	0.984218	female	35	22	female	female	rostrum bone chunk	5.34905	-13.7477	10.5202	9.22677		9.22677	-19.3101		-19.3101	25.1262		25.1262	37.2665	14.0776	0.268155	5.57268	3.08776	370.597	119.995	0.557279	0.180441	no
R12	WLR042	BRM4/4176/1	4	w	Bergen	10039	0.000144628	0.000247765	0.583731	male	57	37	male	male	rostrum bone chunk	4.72859	-13.8813	10.9368	13.704		13.704	-25.3258	-24.5478	-24.9368	17.8649	18.804	18.3344	40.7153	15.3765	0.213874	5.70992	3.0894	507.655	164.332	0.59422	0.192354	no
R13		BRM4/4224/1	4		Bergen						33	23	female	female
R14		BRM633/1/1	3/4		Bergen						57	40	male	male
R15		BRM634/1/1	3/4		Bergen						60		male	male
R16		BRM708/1125	1		Bergen						47		uncertain	uncertain
R17	WLR040	BRM76/19742/1	3/4	unknown	Bergen	176	1.00913e-06	3.16032e-06	0.319313	uncertain	71	46	male	male	rostrum bone chunk	4.93785	-13.991	13.0695	10.6897	11.1405	10.9151	-25.2223	-24.1741	-24.6982	17.9899	19.2551	18.6225	38.4666	14.5169	0.266085	5.57145	3.09136	385.507	124.702	0.575353	0.186113	no
R19	WLR004	JS529 (BRM0/72391)	2/3	unknown	Bergen	1536	2.3654e-05	3.101e-05	0.762786	uncertain	>55		male	male	rostrum bone chunk	3.08956	-13.4393	11.0089	12.8596		12.8596	-15.349		-15.349	29.9075		29.9075	37.326	14.1597	0.212224	5.51988	3.07606	469.013	152.504	0.563508	0.18323	no
R20	WLR002	JS540 (BRM0/81304/a; BRM0/81304/b)	3/4	unknown	Bergen	17741	0.000376292	0.000425251	0.88487	female	37b	23	female	female	rostrum bone chunk	17.5684	-13.072	10.483	14.1977		14.1977	-21.9622	-23.4943	-22.7283	11.226	9.56615	10.3961	42.789	15.8867	0.247755	5.86996	3.1427	460.552	146.566	0.607457	0.193317	no
R22		JS540 (BRM0/81447/01)	4		Bergen						38	23	female	female
R23		B6744a	3		Bergen						55	37	male	male
R24	WLR049	F51873	uncertain	w	Oslo	13021	0.000330349	0.000348962	0.946662	female	44	27	female	female	rostrum bone chunk	17.0736	-13.1853	10.272	11.3703		11.3703	-12.6089		-12.6089	21.3589		21.3589	43.6686	16.2346	0.291814	6.15129	3.13849	399.055	127.162	0.591591	0.188515	no
R25	WLR062	C23798	3/4	e	Oslo	679354	0.00859388	0.0143332	0.599579	male	66		male	male	rostrum bone chunk	5.01676	-13.4187	11.7283	8.34786		8.34786	-7.68988	-2.74368	-5.21678	39.1526	45.1229	42.1378	39.4028	14.7448	0.392474	5.8062	3.11927	267.723	85.8718	0.565527	0.181392	yes
R27	WLR061	C16818	4	unknown	Oslo	5156	7.4942e-05	8.78249e-05	0.853312	female	40	26	female	female	rostrum bone powder	1.97522	-14.0813	10.6123	9.67236	9.62221	9.64729	-33.7515		-33.7515	7.69449		7.69449	33.5679	12.6857	0.398377	5.60508	3.08696	224.698	72.7849	0.499069	0.16166	yes
R28	WLR032	1408	1	unknown	Dublin	240	1.04142e-06	3.37365e-06	0.308692	uncertain	60		male	male	rostrum bone chunk	3.52857	-13.2843	13.4203	-5.892	-5.73642	-5.81421	32.4738		32.4738	87.6326		87.6326	36.1331	13.404	0.567269	5.95624	3.1461	169.858	54.0091	0.505537	0.160744	yes
R29	WLR034	4311	1	e	Dublin	56879	0.000742146	0.00124127	0.597892	male	>52		uncertain	male	rostrum bone chunk	3.69362	-12.9427	12.2447	14.4205		14.4205	23.2903		23.2903	60.2507		60.2507	41.5306	15.5368	0.222174	5.88896	3.119	498.477	159.842	0.587691	0.188449	no
R30	WLR030	323	1	w	Dublin	176907	0.00262375	0.00425865	0.616099	male	74		male	male	rostrum bone chunk	2.43304	-13.1827	11.836	11.903		11.903	12.6631		12.6631	63.7199		63.7199	38.0917	14.2773	0.322114	5.83188	3.11337	315.347	101.311	0.544303	0.174867	no
R31	WLR029	4330	1	e	Dublin	231977	0.00329221	0.00544902	0.604184	male	62	46	male	male	rostrum bone chunk	3.24509	-13.0683	11.4033	14.0263		14.0263	5.39852		5.39852	40.8675		40.8675	40.7053	15.0359	0.250733	6.20919	3.15859	432.921	137.069	0.546304	0.172968	no
R32	WLR031	21273; "bone 3"; S135	2/3	w	London	85436	0.00123507	0.00204362	0.604354	male	NA		uncertain	male	rostrum bone chunk	3.28277	-13.0727	12.3467	6.30186		6.30186	17.5934		17.5934	69.6711		69.6711	41.6596	15.6786	0.489724	6.236	3.10018	226.847	73.1775	0.556709	0.179586	yes
R33	WLR033	21274; "bone 2"; S134	uncertain	w	London	9373	0.0001543	0.000286239	0.53906	male	59	42	male	male	rostrum bone chunk	17.2714	-13.1253	12.5223	13.7156	13.6007	13.6582	20.7439	20.104	20.424	57.492	56.7989	57.1455	42.8857	16.0337	0.236836	6.50261	3.12099	482.874	154.742	0.549596	0.176124	no
R35	WLR073	MHNLM 2004.3.53	4	w	Le Mans	166610	0.00381365	0.00398275	0.957542	female	41	31	female	female
R40	WLR067	FNR 29257	3	w	Sigtuna	30546	0.000420985	0.000729768	0.576875	male	69		male	male	rostrum bone chunk	4.18681	-13.9417	10.086	9.34097	9.29776	9.31936	-43.5175	-41.8411	-42.6793	-9.84253	-7.85617	-8.84935	37.9177	14.3327	0.282271	5.16719	3.08625	358.216	116.06	0.611514	0.198128	no
R44		ZMA 7696	1		Utrecht						75	50	male	male
R45		ZMA 7697	4		Utrecht						50	32	uncertain	uncertain
R48			1		Schleswig						64	43	male	male
R49			2		Schleswig						64	48	male	male
R50		НВ 23057/A164/324; register numbers 74 and 418	4		Novgorod						32	24	female	female
R51	WLR068		3	e	Schleswig	155657	0.00215373	0.0035532	0.606138	male	64		male	male	rostrum bone chunk	3.44162	-12.9783	13.324	10.3336		10.3336	24.5431		24.5431	70.8047		70.8047	39.3407	14.8932	0.25368	5.34211	3.08229	413.547	134.191	0.61369	0.199135	no
R63		96E245:92:28	1		Dublin						66	44	male	male
WLR003	WLR003	Ts7302/JS603	control (phalanx bone)	unknown	Iversfjord, Finnmark	4519	5.43073e-05	7.80792e-05	0.695541	male	NA		uncertain	male	phalanx bone chunk	3.61345	-14.127	10.8017	12.9785		12.9785	-8.68794		-8.68794	25.6068		25.6068	42.5155	15.6873	0.218342	5.75494	3.1622	519.252	164.223	0.615637	0.194706	no
WLR005	WLR005	Ts7302/JS603	control (skull bone)	unknown	Iversfjord, Finnmark	1322	1.13749e-05	2.22797e-05	0.51055	uncertain	NA		uncertain	uncertain	skull fragment bone chunk	1.80633	-14.7663	9.89	13.1799		13.1799	-50.901		-50.901	-18.5916		-18.5916	24.0432	8.57112	0.160818	4.16757	3.2736	398.68	121.821	0.480759	0.146902	no
WLR009	WLR009	JS366	control (skull bone)	e	Russekeila, Svalbard	395898	0.00562123	0.00940981	0.59738	male	NA		uncertain	male	skull fragment bone chunk	4.79666	-14.3317	9.42467	14.7409		14.7409	-25.2099	-26.416	-25.8129	11.8508	10.4216	11.1362	38.1823	14.5367	0.198666	5.44717	3.06548	512.515	167.249	0.584131	0.190619	no
WLR069	WLR069	P151/2017 KMG	control (rostrum of uncertain type)	e	Igaliku/Gardar, Greenland	15018	0.000334288	0.00036534	0.915005	female	21		female	female	rostrum bone powder	11.2977	-13.9153	11.1707	15.0898	14.5423	14.816	-16.7851		-16.7851	21.8335		21.8335	43.4951	16.4104	0.243938	5.70454	3.09229	475.477	153.766	0.635387	0.20548	no
WLR070	WLR070	P149/2017 KMG	control (type 1)	e	Igaliku/Gardar, Greenland	28794	0.000623246	0.000679215	0.917598	female	31		female	female	rostrum bone powder	14.7246	-13.6267	11.159	14.7146		14.7146	-22.1444	-22.3926	-22.2685	15.4831	15.189	15.3361	41.5129	15.5329	0.248639	5.46716	3.11804	445.227	142.792	0.632761	0.202938	no
WLR071	WLR071	P153/2017 KMG	control (type 3)	w	Igaliku/Gardar, Greenland	19451	0.000274419	0.000444772	0.616988	male	57	36	male	male	rostrum bone powder	11.524	-13.355	11.7413	14.0341		14.0341	-0.711584		-0.711584	40.8796		40.8796	43.6779	16.3595	0.262976	5.67949	3.11602	442.909	142.193	0.640872	0.205747	no
WLR072	WLR072	P155/2017 KMG	control (rostrum of uncertain type)	w	Igaliku/Gardar, Greenland	52883	0.000820019	0.00127584	0.642729	male	58		male	male	rostrum bone powder	14.2218	-13.165	10.7867	14.5741		14.5741	-4.69456		-4.69456	36.16		36.16	42.7103	16.079	0.235833	5.78268	3.0992	482.943	155.839	0.615491	0.198611	no
aWhere relevant, these aDNA sample numbers (excluding the prefix WLR0) match those published in Supplementary Table 1 of Star et al. 2018.
bMaximum cross section calculated from minimum cross section (see Barrett et al. 2020).
†The isotopic standards used are: IAEA (International Atomic Energy Agency) standard of caffeine for carbon and nitrogen; in-house laboratory standards of nylon, alanine, protein 2 and EMC (Elemental Microanalysis caffeine) standard for carbon, nitrogen and atomic C/N ratios.
‡The reference material used was IA-R061 (barium sulphate). IA-R061, IA-R025 and IA-R026 were used for calibration and correction of the 18O contribution to the SO+ ion beam. These are in-house standards calibrated against and traceable to NBS-127 and IAEA-S-1. IA-R061, IAEA-SO-5, IA-R068 and IA-R069 were included as quality control checks. IA-R068 and IA-R069 are in-house standards calibrated ag…
‡‡The reference material used was IA-R002 (mineral oil) calibrated against and traceable to IAEA NBS-22. Samples of IA-R002, IAEA-CH-7 and either Eurofins 14/1/D (previously published data) or IA-R072 (newly reported data) were used as quality control check samples. IA-R072 is an in-house standard calibrated against NBS-22. Control samples of USGS42, USGS43, USGS CBS (newly reported data only), U…
References
Star, B., Barrett, J.H., Gondek, A.T. & Boessenkool, S. 2018 Ancient DNA reveals the chronology of walrus ivory trade from Norse Greenland. Proceedings of the Royal Society B 285, 20180978. (doi:10.1098/rspb.2018.0978).
Barrett, J.H., Boessenkool, S., Kneale, C.J., O’Connell, T.C. & Star, B. 2020 Ecological globalisation, serial depletion and the medieval trade of walrus rostra. Quaternary Science Reviews 229, 106122. (doi:10.1016/j.quascirev.2019.106122).
